# Supplementary material for: Two viologen-based photoluminescent compounds: excitation-wavelength-dependent and photoirradiation-time-dependent photoluminescent switches
Source: Royal Society of Chemistry journal article supplement (doi:10.1039/d1ce00072a), 2021-01-01
Supplement: d1ce00072a1.pdf [file d1ce00072a1.pdf]

# **Two viologen-based photoluminescence compounds: excitation-wavelength-dependent and photoirradiation-time-dependent photoluminescence switches**

**Qing Liu<sup>a, b</sup>, Lu Liu<sup>a, b</sup>, Cao-Ming Yu<sup>b</sup>, Pei-Xin Li<sup>b, \*</sup> and Guo-Cong Guo<sup>b, \*</sup>**

a College of Chemistry and Materials Science, Fujian Normal University, Fuzhou, Fujian 350007, P. R. China.

b State Key Laboratory of Structural Chemistry, Fujian Institute of Research on the Structure of Matter, Chinese Academy of Sciences, Fuzhou, Fujian 350002, P. R. China.

## **Content**

|                        |          |
|------------------------|----------|
| <b>1. Figure .....</b> | <b>2</b> |
| <b>2. Table .....</b>  | <b>5</b> |

# 1. Figure

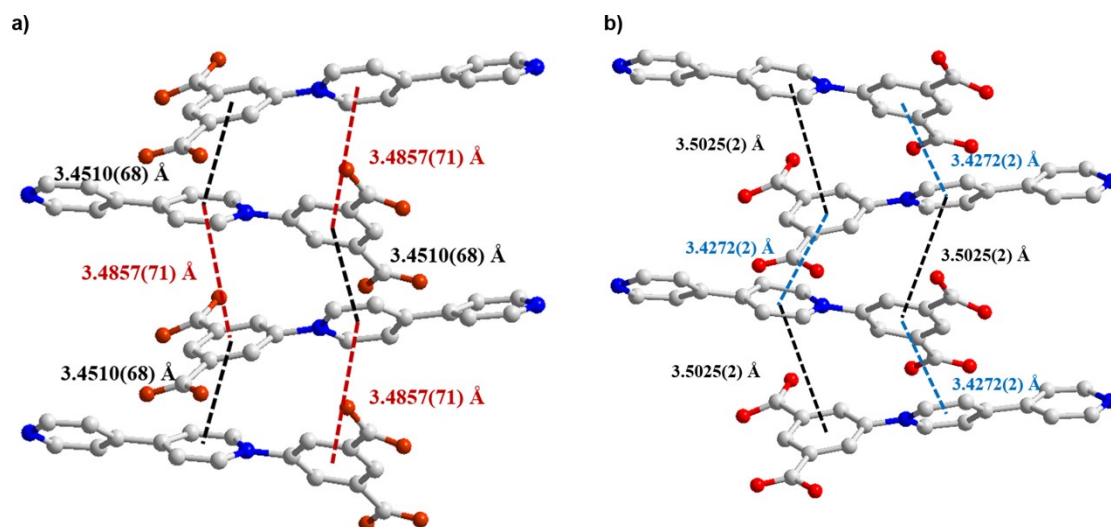

Fig. S1 The  $\pi$ - $\pi$  interactions of **1** (a) and **2** (b).

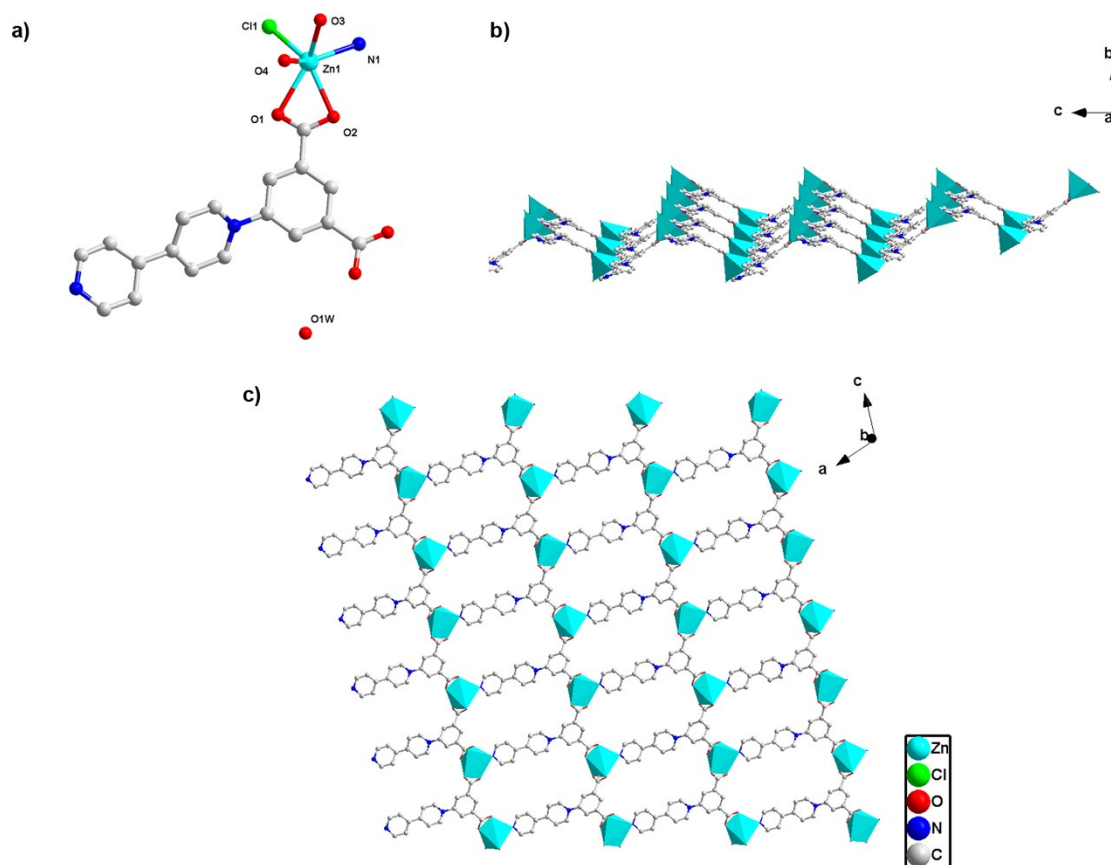

Fig. S2 Crystal structures of **2**. (a) Coordination environments of the  $Zn^{2+}$  ion (b) Stack Z-shaped non-planar layers in the direction [001]. (c) A 2D layer with topology.

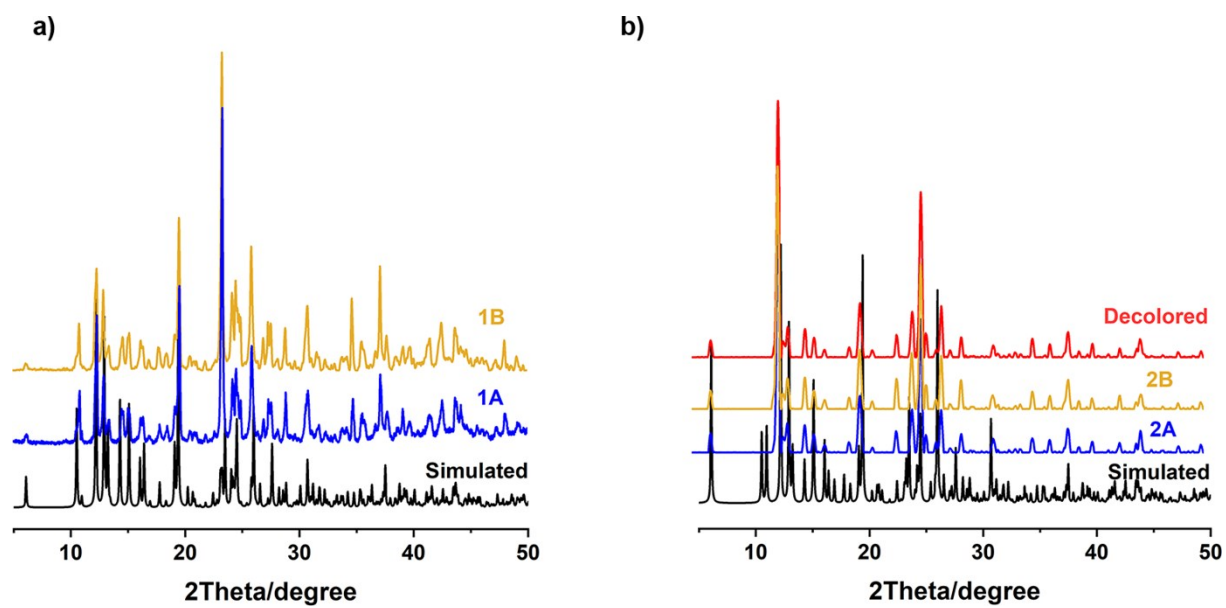

Fig. S3 The PXRD patterns of **1** (a) and **2** (b) simulated (**Simulated**), before irradiation (**1A** and **2A**), after irradiation (**1B** and **2B**) and discoloration in the dark (**Decolored**) at 25°C.

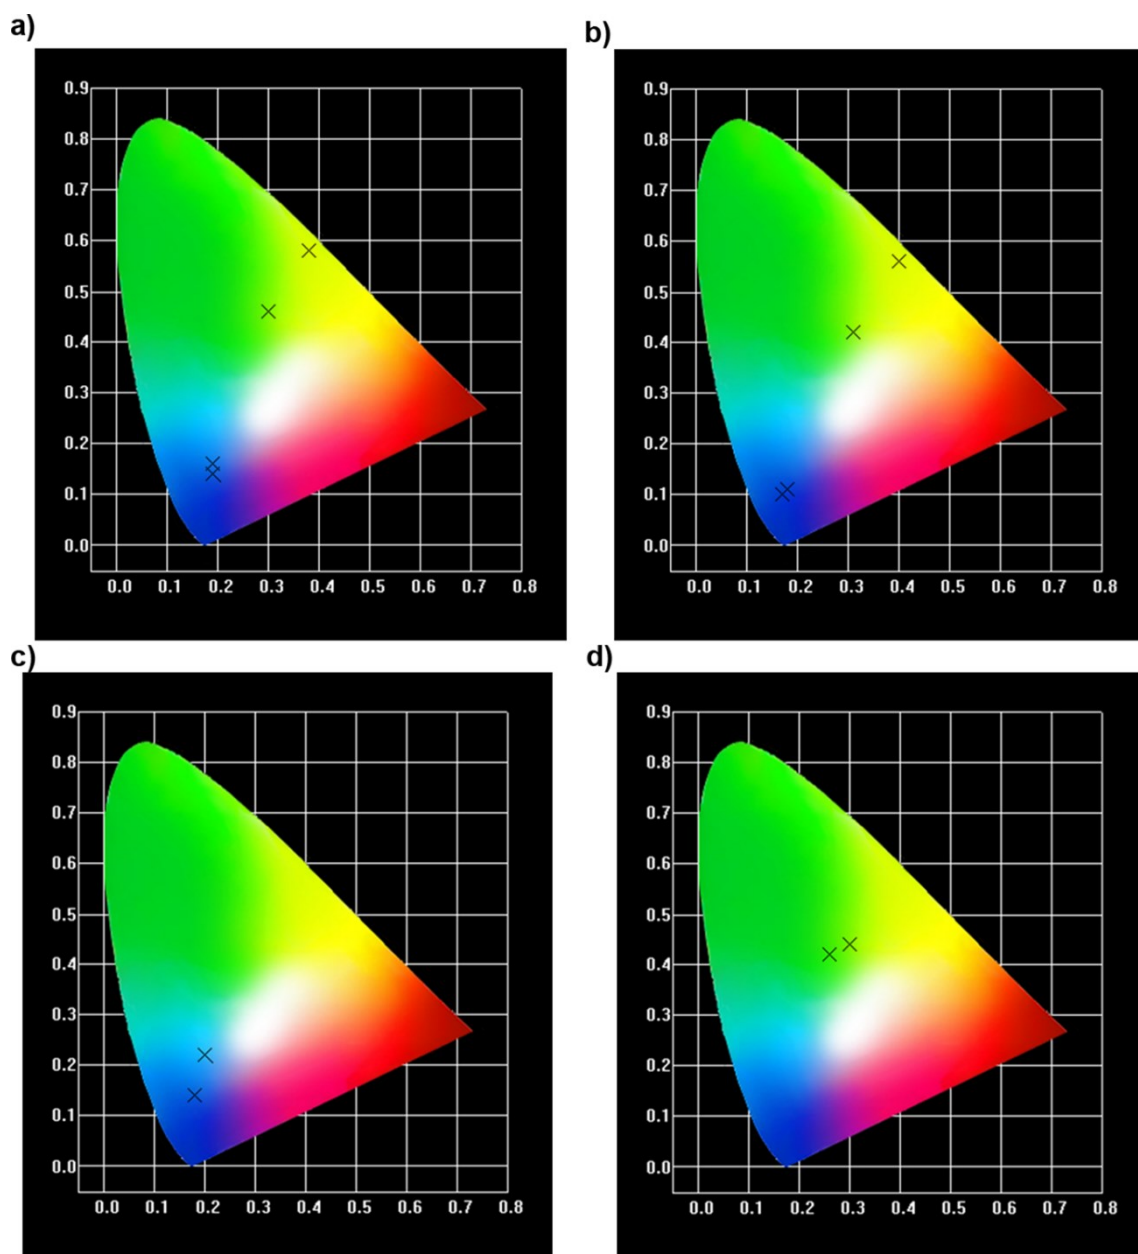

Fig. S4 CIE chromaticity diagram showing the excitation wavelengths dependence ( $\lambda_{\text{ex}}=260\text{nm}, 330\text{nm}, 360\text{nm}, 460\text{nm}$ ) of the (x, y) color coordinates of **1** (a) and **2** (b); and the CIE chromaticity diagram of **1** before and after photoirradiation when excitation wavelengths are 330 nm (c) and 265 nm (d).

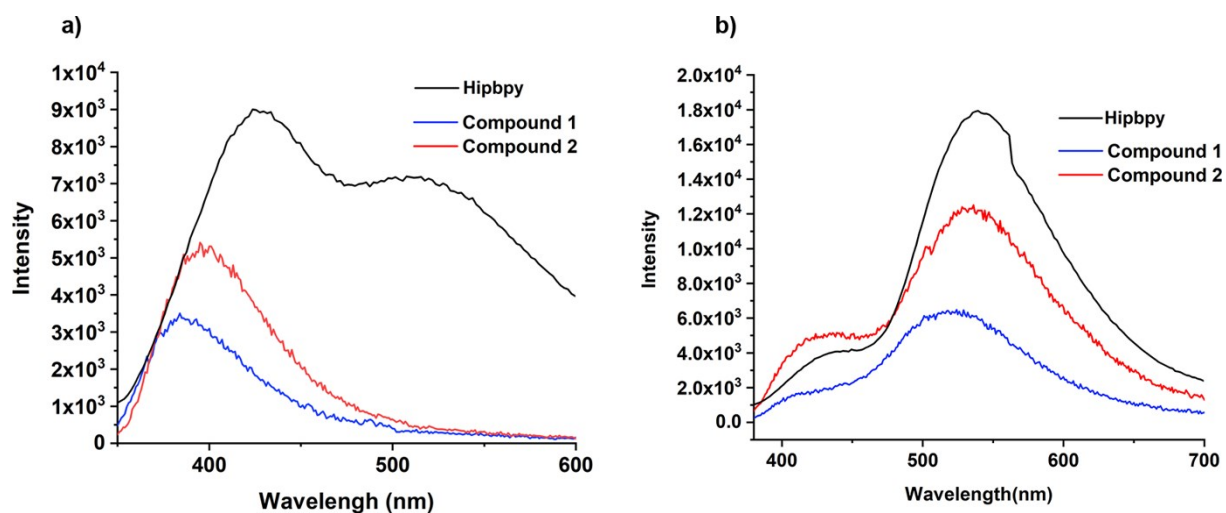

Fig. S5 The fluorescence emission spectrum of **1**, **2** and Hipbpy ligand at  $\lambda_{\text{ex}}=330\text{nm}$  (a) and  $\lambda_{\text{ex}}=360\text{nm}$  (b).

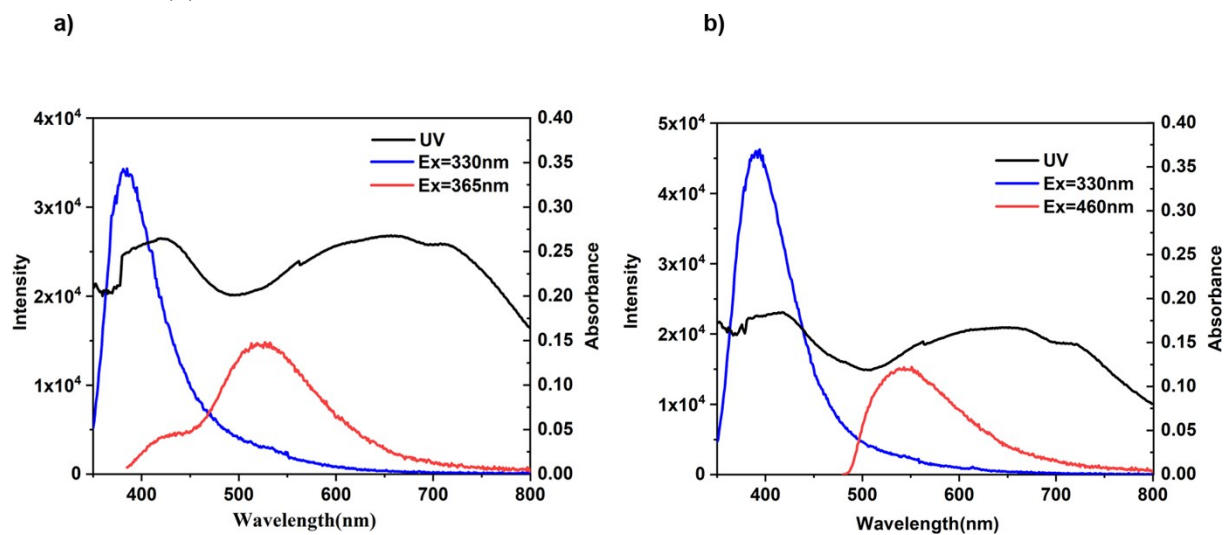

Fig. S6 (a) The fluorescence emission spectrum of **1** at Ex=330nm and Ex=365nm and the UV-vis spectrum after illumination. (b) The fluorescence emission spectrum of **2** at Ex=330nm and Ex=460nm and the UV-vis spectrum after illumination.

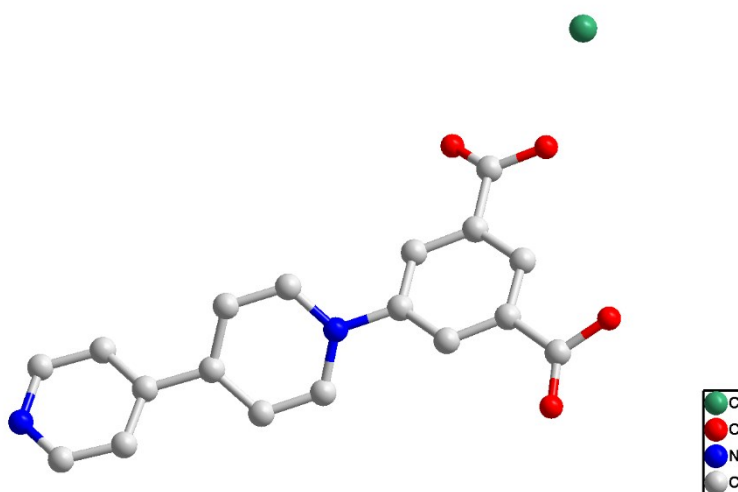

Fig. S7 Crystal structures of H<sub>2</sub>ipbpCl.

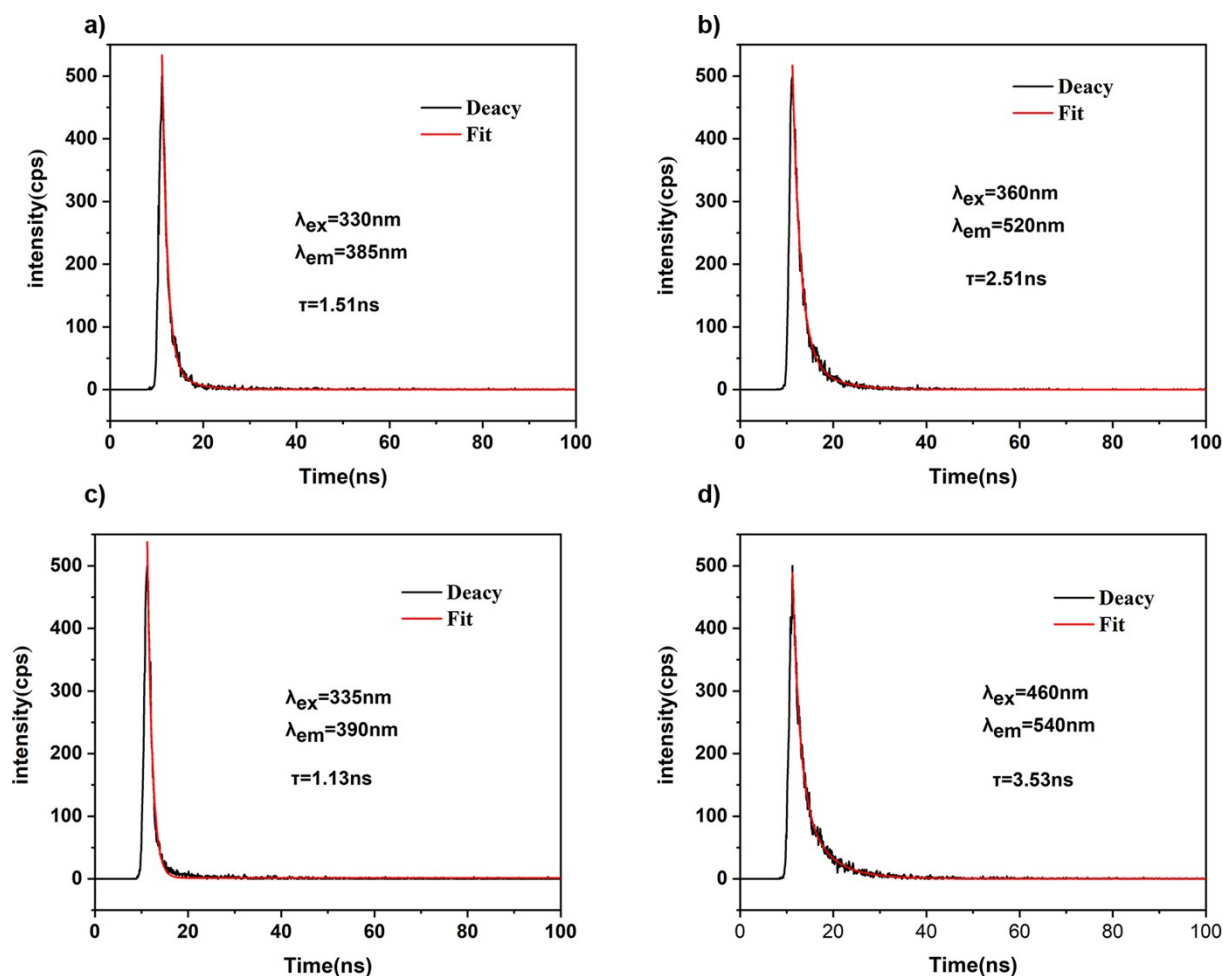

Fig. S8 The lifetime of **1** upon 330 nm(a) and 360nm (b) excitation with their maximum emission; the lifetime of **2** upon 335 nm (c) and 460nm (d) excitation with their maximum.

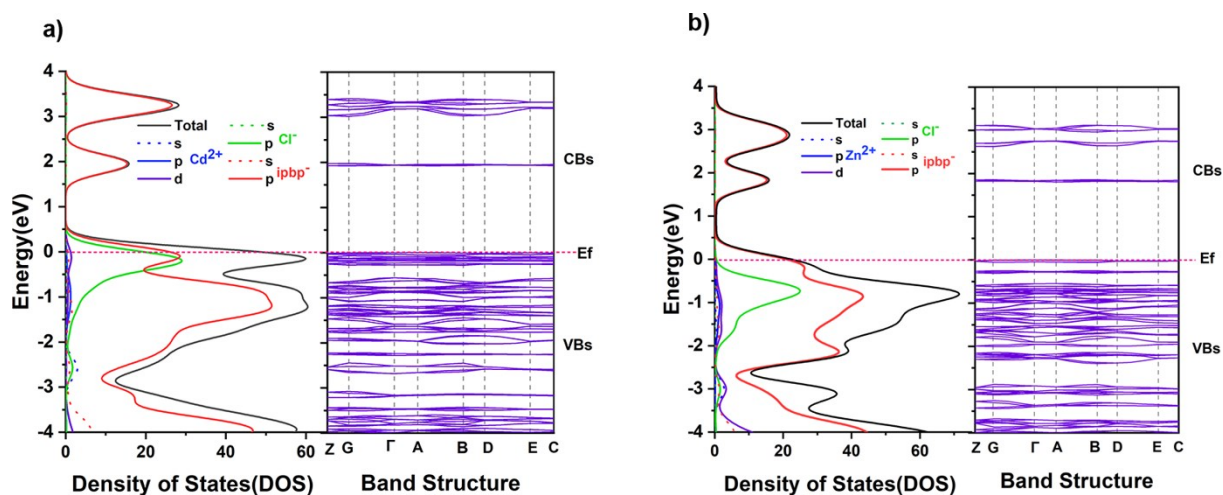

Fig. S9 The Band Structure and the total and partial DOS of **1** (a) and **2** (b). (the position of the Fermi level ( $E_f$ ) is set at 0 eV).

## 2. Table

**Table S1.** Crystal data and structural refinements for **1** and **2**.

| Formula                                                                     | [Cd(ipbp)Cl]·H <sub>2</sub> O( <b>1</b> ) | [Zn(ipbp)Cl]·H <sub>2</sub> O( <b>2</b> ) |
|-----------------------------------------------------------------------------|-------------------------------------------|-------------------------------------------|
| <i>F</i> <sub>w</sub>                                                       | 485.15                                    | 438.12                                    |
| Crystal system                                                              | monoclinic                                | monoclinic                                |
| Space group                                                                 | P2 <sub>1</sub> /c                        | P2 <sub>1</sub> /c                        |
| <i>a</i> / Å                                                                | 15.4911(4)                                | 15.5044(13)                               |
| <i>b</i> / Å                                                                | 7.5672(2)                                 | 7.5706(5)                                 |
| <i>c</i> / Å                                                                | 17.2289(5)                                | 17.2282(15)                               |
| <i>α</i> / °                                                                | 90                                        | 90                                        |
| <i>β</i> / °                                                                | 110.483(3)                                | 110.423(2)                                |
| <i>γ</i> / °                                                                | 90                                        | 90                                        |
| <i>V</i> / Å <sup>3</sup>                                                   | 1891.95(10)                               | 1895.1(3)                                 |
| <i>Z</i>                                                                    | 4                                         | 4                                         |
| <i>D</i> <sub>c</sub> / g·cm <sup>-3</sup>                                  | 1.633                                     | 1.491                                     |
| <i>μ</i> / mm <sup>-1</sup>                                                 | 1.318                                     | 1.466                                     |
| Goodness-of-fit on <i>F</i> <sup>2</sup>                                    | 1.436                                     | 0.928                                     |
| <i>R</i> <sub>1</sub> , <i>wR</i> <sub>2</sub> [ <i>I</i> > 2σ( <i>I</i> )] | 0.0497, 0.1791                            | 0.1015, 0.3359                            |
| <i>R</i> <sub>1</sub> , <i>wR</i> <sub>2</sub> (all data)                   | 0.0578, 0.1873                            | 0.1133, 0.3645                            |

$$R_1 = \sum ||F_o| - |F_c|| / \sum |F_o|, wR_2 = \{ \sum w[(F_o)^2 - (F_c)^2]^2 / \sum w[(F_o)^2]^2 \}^{1/2}.$$

**Table S2.** The bond lengths (Å) and bond angles (o) in **1**.

| The bond lengths (Å) in <b>1</b> |            |         |          |
|----------------------------------|------------|---------|----------|
| Cd1–Cl1                          | 2.4533(14) | C2–C1   | 1.364(8) |
| Cd1–O1#1                         | 2.404(3)   | C12–C11 | 1.386(7) |
| Cd1–O2#1                         | 2.334(4)   | C12–C13 | 1.377(7) |
| Cd1–N1                           | 2.306(4)   | C11–C18 | 1.363(6) |
| Cd1–O3#2                         | 2.444(4)   | C13–C15 | 1.381(6) |
| Cd1–O4#2                         | 2.347(4)   | C13–C14 | 1.515(7) |
| Cd1–C14#1                        | 2.673(5)   | C6–C5   | 1.355(6) |
| Cd1–C17#2                        | 2.722(5)   | C16–C18 | 1.392(6) |
| O1–C14                           | 1.246(7)   | C16–C15 | 1.387(6) |
| O2–C14                           | 1.247(7)   | C16–C17 | 1.500(6) |
| O3–C17                           | 1.242(6)   | C5–C4   | 1.390(7) |

|                                 |            |             |          |
|---------------------------------|------------|-------------|----------|
| O4–C17                          | 1.237(6)   | C4–C8       | 1.400(7) |
| N2–C11                          | 1.474(6)   | C4–C3       | 1.476(7) |
| N2–C6                           | 1.359(6)   | C10–C9      | 1.376(8) |
| N2–C7                           | 1.341(7)   | C9–C3       | 1.379(8) |
| N1–C10                          | 1.339(7)   | C7–C8       | 1.361(7) |
| N1–C1                           | 1.336(7)   | C3–C2       | 1.414(7) |
| The bond angles (°) in <b>1</b> |            |             |          |
| C13–C14–Cd1#3                   | 169.9(3)   | C1–N1–C10   | 116.8(5) |
| O1#1–Cd1–C11                    | 98.52(9)   | C1–C2–C3    | 118.7(5) |
| O1#1–Cd1–O3#2                   | 133.61(13) | C2–C3–C4    | 119.8(5) |
| O1–C14–O2                       | 124.0(5)   | C5–C4–C8    | 118.1(5) |
| O1–C14–C13                      | 118.6(5)   | C5–C4–C3    | 121.1(5) |
| O2#1–Cd1–C11                    | 141.92(11) | C5–C6–N2    | 120.4(4) |
| O2#1–Cd1–O1#1                   | 55.37(13)  | C6–C5–C4    | 120.1(4) |
| O2#1–Cd1–O3#2                   | 120.87(13) | C6–N2–C11   | 118.7(4) |
| O2#1–Cd1–O4#2                   | 95.30(15)  | C7–N2–C11   | 120.3(4) |
| O2–C14–C13                      | 117.4(5)   | C7–C8–C4    | 120.1(5) |
| O3#2–Cd1–C11                    | 97.19(10)  | C7–N2–C6    | 121.0(4) |
| O3–C17–C16                      | 120.0(5)   | C8–C4–C3    | 120.8(4) |
| O4#2–Cd1–C11                    | 107.53(12) | C9–C3–C4    | 122.7(5) |
| O4#2–Cd1–O1#1                   | 79.75(14)  | C9–C3–C2    | 117.5(5) |
| O4#2–Cd1–O3#2                   | 53.90(13)  | C10–C9–C3   | 119.1(5) |
| O4–C17–O3                       | 122.4(5)   | C11–C18–C16 | 119.0(4) |
| O4–C17–C16                      | 117.5(5)   | C12–C11–N2  | 118.9(4) |
| N1–C1–C2                        | 124.0(5)   | C12–C13–C15 | 119.5(4) |
| N1–Cd1–C11                      | 97.78(11)  | C12–C13–C14 | 118.9(4) |
| N1–Cd1–O1#1                     | 133.92(14) | C13–C12–C11 | 119.1(4) |
| N1–Cd1–O2#1                     | 86.66(15)  | C13–C15–C16 | 121.1(4) |
| N1–Cd1–O3#2                     | 86.12(14)  | C15–C16–C18 | 119.2(4) |
| N1–Cd1–O4#2                     | 134.21(15) | C15–C16–C17 | 120.4(4) |
| N1–C10–C9                       | 123.7(5)   | C15–C13–C14 | 121.6(4) |
| N2–C7–C8                        | 120.3(5)   | C18–C16–C17 | 120.1(4) |
| C18–C11–N2                      | 119.0(4)   | C18–C11–C12 | 122.2(5) |

Symmetry transformations used to generate equivalent atoms: #1 -1+X, +Y, +Z; #2 -1+X, 1/2-Y, -1/2+Z; #3 1+X, +Y, +Z; #4 1+X, 1/2-Y, 1/2+Z

**Table S3.** The bond lengths (Å) and bond angles (°) in **2**.

| The bond lengths (Å) in <b>2</b> |           |         |           |
|----------------------------------|-----------|---------|-----------|
| Zn1–C11                          | 2.439(3)  | O4–C17  | 1.250(13) |
| Zn1–O1#1                         | 2.399(7)  | C12–C11 | 1.411(15) |
| Zn1–N1                           | 2.281(10) | C12–C13 | 1.367(16) |
| Zn1–O2#1                         | 2.373(11) | C18–C11 | 1.392(14) |
| Zn1–O3#2                         | 2.412(8)  | C18–C16 | 1.387(13) |
| Zn1–O4#2                         | 2.405(9)  | C10–C9  | 1.388(15) |



|          |           |         |           |
|----------|-----------|---------|-----------|
| O1–Zn1#3 | 2.399(7)  | C13–C14 | 1.534(15) |
| O1–C14   | 1.200(13) | C13–C15 | 1.394(14) |
| N1–C10   | 1.375(15) | C9–C3   | 1.426(15) |
| N1–C1    | 1.376(15) | C7–C8   | 1.415(16) |
| N2–C11   | 1.423(13) | C6–C5   | 1.402(16) |
| N2–C7    | 1.319(14) | C3–C2   | 1.365(16) |
| N2–C6    | 1.347(14) | C3–C4   | 1.475(15) |
| O2–Zn1#3 | 2.373(11) | C16–C15 | 1.436(13) |
| O2–C14   | 1.262(13) | C16–C17 | 1.491(13) |
| O3–Zn1#4 | 2.412(8)  | C1–C2   | 1.300(18) |
| O3–C17   | 1.226(13) | C5–C4   | 1.387(15) |
| O4–Zn1#4 | 2.405(9)  | C8–C4   | 1.379(16) |

The bond angles (°) in **2**

|               |           |             |           |
|---------------|-----------|-------------|-----------|
| O1#1–Zn1–Cl1  | 99.06(19) | C18–C11–N2  | 120.4(9)  |
| O1#1–Zn1–O3#2 | 132.9(3)  | C18–C11–C12 | 120.7(10) |
| O1#1–Zn1–O4#2 | 79.8(3)   | C12–C13–C14 | 117.3(10) |
| N1–Zn1–Cl1    | 98.9(3)   | C12–C13–C15 | 121.9(10) |
| N1–Zn1–O1#1   | 133.3(3)  | C15–C13–C14 | 120.7(10) |
| N1–Zn1–O2#1   | 87.5(3)   | C10–C9–C3   | 118.6(10) |
| N1–Zn1–O3#2   | 86.4(3)   | N2–C7–C8–   | 121.4(11) |
| N1–Zn1–O4#2   | 135.8(4)  | N2–C6–C5    | 122.8(10) |
| O2#1–Zn1–Cl1  | 143.7(2)  | C9–C3–C4    | 118.9(10) |
| O2#1–Zn1–O11  | 54.4(3)   | C2–C3–C9    | 115.4(10) |
| O2#1–Zn1–O3#2 | 118.6(3)  | C2–C3–C4    | 125.7(10) |
| O2#1–Zn1–O4#2 | 95.9(3)   | C18–C16–C15 | 118.9(9)  |
| O3#2–Zn1–Cl1  | 97.5(3)   | C18–C16–C17 | 121.9(9)  |
| O4#2–Zn1–Cl1  | 103.6(3)  | C15–C16–C17 | 119.2(9)  |
| O4#2–Zn1–O3#2 | 53.5(3)   | C2–C1–N1    | 124.9(11) |
| C14–O1–Zn1#3  | 90.3(6)   | C4–C5–C6    | 116.7(11) |
| C10–N1–Zn1    | 124.0(8)  | C1–C2–C3    | 123.4(11) |
| C10–N1–C1     | 113.6(10) | O1–C14–O2   | 124.7(11) |
| C1–N1–Zn1     | 122.4(8)  | O1–C14–C13  | 118.8(9)  |
| C7–N2–C11     | 119.8(10) | O2–C14–C13  | 116.2(11) |
| C7–N2–C6      | 119.7(9)  | C4–C8–C7    | 118.1(10) |
| C6–N2–C11     | 120.2(9)  | C13–C15–C16 | 119.1(9)  |
| C14–O2–Zn1#3  | 90.0(8)   | O3–C17–O4   | 122.2(10) |
| C17–O3–Zn1#4  | 91.9(7)   | O3–C17–C16  | 121.3(10) |
| C17–O4–Zn1#4  | 91.5(7)   | O4–C17–C16  | 116.2(10) |
| C13–C12–C11   | 118.9(11) | C5–C4–C3    | 118.0(10) |
| C16–C18–C11   | 120.4(9)  | C8–C4–C3    | 121.1(10) |
| N1–C10–C9     | 123.8(11) | C8–C4–C5    | 120.9(10) |
| C12–C11–N2    | 118.9(10) |             |           |

Symmetry transformations used to generate equivalent atoms: #1 1+X, +Y, +Z; #2 1+X, 3/2-Y, 1/2+Z; #3 -

$1+X, +Y, +Z; \#4 -1+X, 3/2-Y, -1/2+Z$
